# Supplementary material for: Construction of a Au@MoS2 composite nanosheet biosensor for the ultrasensitive detection of a neurotransmitter and understanding of its mechanism based on DFT calculations
Source: Royal Society of Chemistry journal article supplement (doi:10.1039/d1ra07962j), 2022-01-01
Supplement: d1ra07962j1.pdf [file d1ra07962j1.pdf]

## Supporting information

### Construction of Au@MoS<sub>2</sub> composite nanosheets biosensor for the ultrasensitive detection of neurotransmitter and Understanding of its mechanism based on DFT calculations

Kaida Lu<sup>a, #</sup>, Jiamei Liu<sup>a, #</sup>, Xinyue Dai<sup>b</sup>, Li Zhao<sup>a</sup>, Yufei Yang<sup>a</sup>, Hui Li<sup>a</sup>, Yanyan Jiang<sup>a, c, \*</sup>

<sup>a</sup> Liquid-Solid Structural Evolution & Processing of Materials (Ministry of Education), School of Materials Science and Engineering, Shandong University, Jinan, Shandong, 250061, P. R. China

<sup>b</sup> School of Life Sciences, Shanghai University, Shanghai, 200444, P. R. China

<sup>c</sup> Shenzhen Research Institute of Shandong University, Shenzhen, Guangdong, 518000, P. R. China

\* Corresponding author.

E-mail addresses: [yanyan.jiang@sdu.edu.cn](mailto:yanyan.jiang@sdu.edu.cn) (Y. Y. Jiang).

# The authors contributed equally to this work.

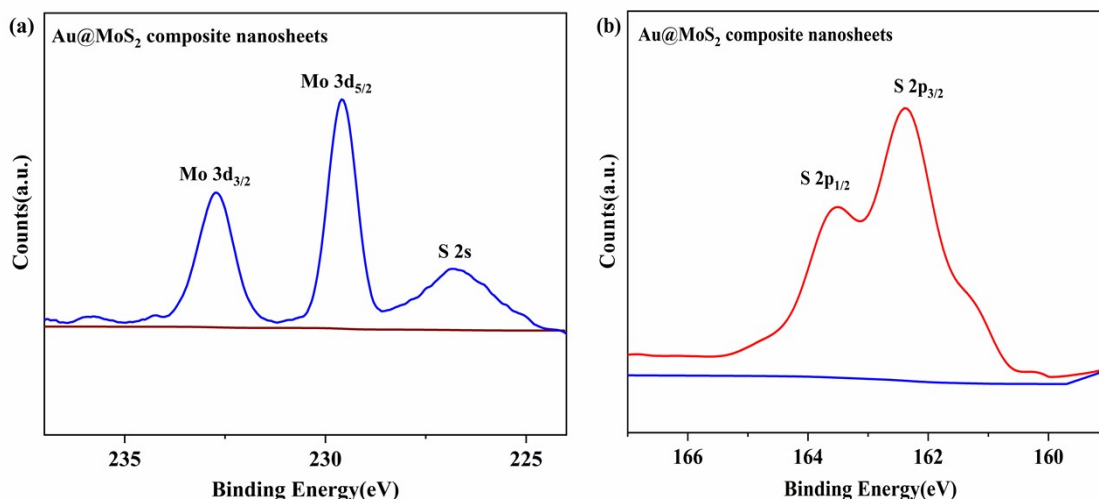

**Figure S1.** XPS spectra of Au@MoS<sub>2</sub> composite nanosheets. (a) high resolution Mo 3d of Au@MoS<sub>2</sub> composite nanosheets; (b) high resolution S 2p of Au@MoS<sub>2</sub> composite nanosheets. (The peaks of Mo 3d<sub>3/2</sub>, Mo 3d<sub>5/2</sub>, S 2s, S 2p<sub>1/2</sub> and S 2p<sub>3/2</sub> are located at 232.75 eV, 229.65 eV, 226.8eV, 163.4eV and 162.45eV, respectively. )

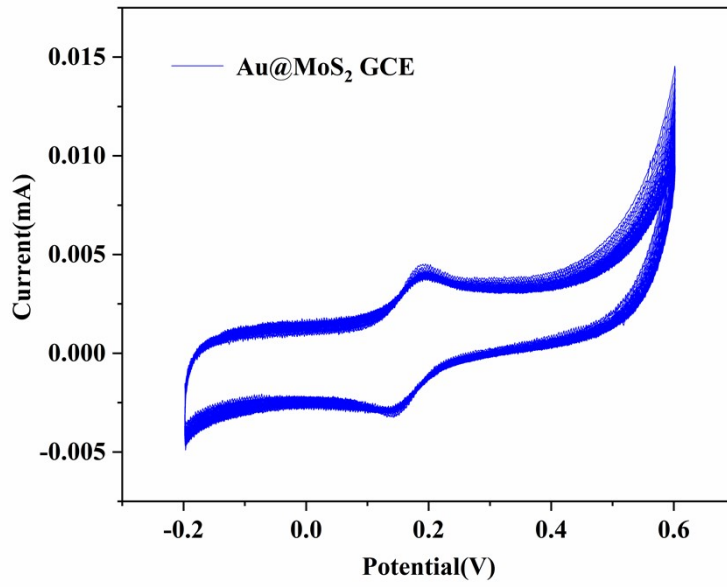

**Figure S2.** CV curves of Au@MoS<sub>2</sub>/GCE cyclic detection (50 cycles) in PBS (pH=7.0, 0.1M) containing 150  $\mu$ M DA.
